# Supplementary material for: Kratom ( Mitragyna speciosa ) Validation: Quantitative Analysis of Indole and Oxindole Alkaloids Reveals Chemotypes of Plants and Products
Source: PubMed Central journal article supplement — Planta Med. 2022 Apr 25;88(09-10):838–57. doi: 10.1055/a-1795-5876 (PMC9343938; doi:10.1055/a-1795-5876), 2022-04-25
Supplement: 10-1055-a-1795-5876-sup_pmf0940.pdf [file 10-1055-a-1795-5876-sup_pmf0940.pdf]

Supplementary material

## Kratom (*Mitragyna speciosa*) validation: quantitative analysis of indole and oxindole alkaloids reveals chemotypes of plants and products

Preston K. Manwill<sup>1</sup>, Laura Flores-Bocanegra<sup>1</sup>, Manead Khin<sup>1</sup>, Nadja B. Cech<sup>1</sup>, Nicholas H. Oberlies<sup>1,\*</sup>, and Daniel A. Todd<sup>1,\*</sup>

<sup>1</sup>Department of Chemistry and Biochemistry, University of North Carolina at Greensboro, Greensboro, NC, 27402, USA

\* Corresponding authors:

Daniel A. Todd

Tel.: (336) 334-4768

E-mail address: [datodd3@uncg.edu](mailto:datodd3@uncg.edu)

Nicholas H. Oberlies

Tel.: (336) 334-5474

Email address: [nicholas\\_oberlies@uncg.edu](mailto:nicholas_oberlies@uncg.edu)

## 1 Table of Contents

|                                                                                                                                                                                                 |    |
|-------------------------------------------------------------------------------------------------------------------------------------------------------------------------------------------------|----|
| <b>Table 1S</b> List of publications covering the analytical analysis of kratom plants and products.....                                                                                        | 3  |
| <b>Fig. 1S</b> Comparison of a kratom extract analyzed using a generic screening method with a BEH C18 column (A) and the developed method using a Kinetex F5 column (B). .....                 | 4  |
| <b>Table 2S</b> Intraday and interday precision (as measured by RSD) and accuracy (as measured by RE) of the method for kratom alkaloid quantification. ....                                    | 8  |
| <b>Table 3S</b> Concentration (µg/mL) and Percent recovery (%) of internal standard mitragynine- <i>d</i> <sub>3</sub> , which was added to all solutions at a concentration of 125 µg/mL. .... | 12 |
| <b>Fig. 2S</b> Base peak MS chromatograms representing the methanolic extracts of kratom material quantified in Table 2. ....                                                                   | 11 |
| <b>Fig. 3S</b> Base peak MS chromatograms representing the methanolic extracts of kratom material quantified in Table 3. ....                                                                   | 12 |
| <b>Fig. 4S</b> Base peak MS chromatograms representing the methanolic extracts of kratom material quantified in Table 4. ....                                                                   | 13 |
| <b>Table 4S</b> Literature references for purchased indole and oxindole alkaloid standards. ....                                                                                                | 14 |
| <b>Table 5S</b> Commercial kratom products and <i>M. speciosa</i> specimens analyzed in this study. ....                                                                                        | 15 |

|                                                                                                                                                            |    |
|------------------------------------------------------------------------------------------------------------------------------------------------------------|----|
| <b>Fig. 5S</b> Graphical overview of the BLAST results (January 2022) in NCBI GenBank database using Internal Transcribed Spacer (ITS) region of K64. .... | 15 |
| <b>Fig. 6S</b> Graphical overview of the BLAST results (January 2022) in NCBI GenBank database using Internal Transcribed Spacer (ITS) region of K68. .... | 16 |
| <b>Fig. 7S</b> Phylogram of the most likely tree (-lnL = 1320.66) from a RAxML analysis of 20 taxa based on ITS region (608 bp).                           |    |
| <b>Table 6S</b> Precursor ion inclusion list for MS <sup>2</sup> analysis. ....                                                                            | 19 |
| <b>Table 7S</b> Constrains peak width settings used for peak integration. ....                                                                             | 19 |

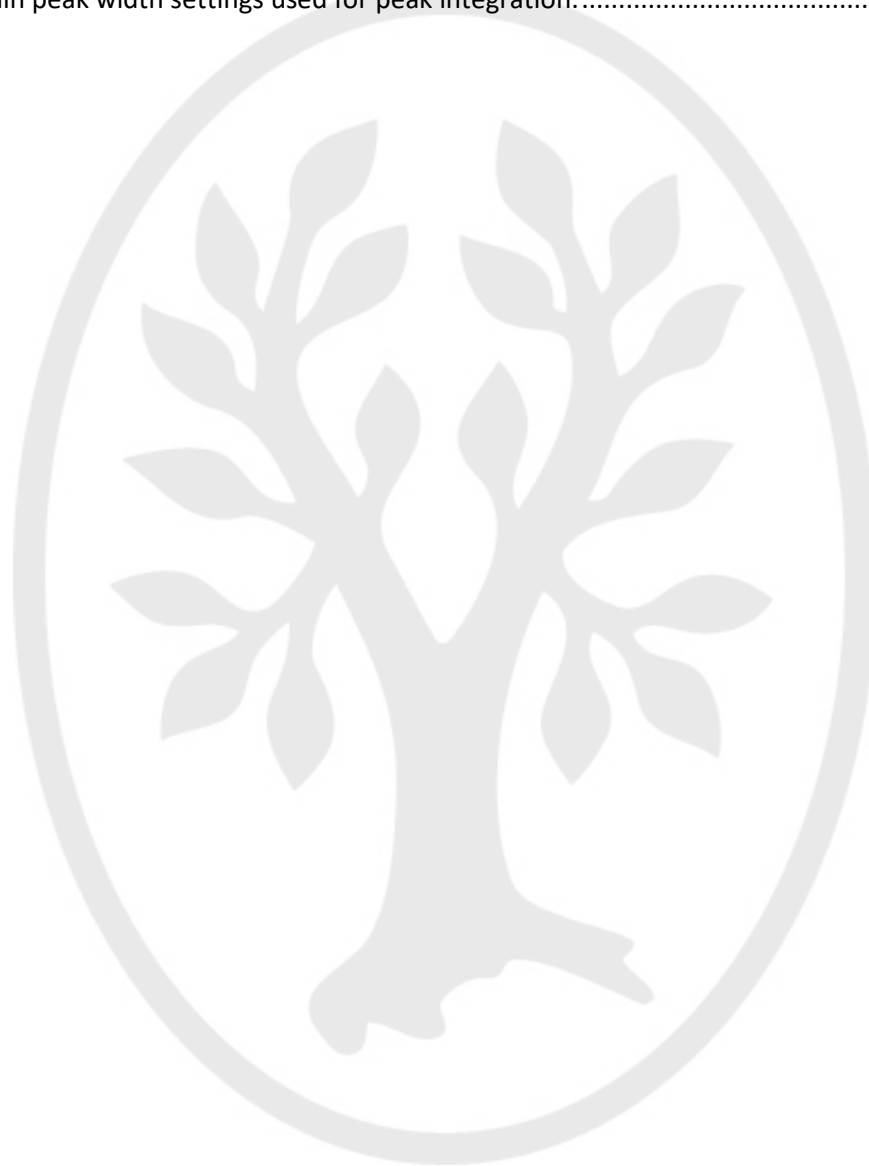

**Table 1S** List of publications covering the analytical analysis of kratom plants and products.

| Biological matrix                                                                 | LOD (ng/mL) | LOQ (ng/mL) | Calibration range               | Compounds detected                                      | Concentration                                                   | Concentration (%)                                                                                                                               | Internal standard(s)               | Analytical technique | Column         | Solvent system                                         | Run time | Reference |
|-----------------------------------------------------------------------------------|-------------|-------------|---------------------------------|---------------------------------------------------------|-----------------------------------------------------------------|-------------------------------------------------------------------------------------------------------------------------------------------------|------------------------------------|----------------------|----------------|--------------------------------------------------------|----------|-----------|
| kratom cocktail' (4 x 100)                                                        | 1.000 mg/L  | 3.000 mg/L  | 5.000–100.000 mg/L              | MG                                                      | 90.021 mg/L                                                     |                                                                                                                                                 |                                    | HPLC-DAD             | Eclipse XDB-C8 | methanol:water (80:20, v/v)                            | 10 min   | [1]       |
| commercial products, live plant (US)                                              |             | 5 µg/mL     | 5–100 µg/mL                     | MG                                                      | 2.76–20.05 mg/g                                                 |                                                                                                                                                 | mitragynine- <i>d</i> <sub>3</sub> | DART-HRMS            |                | methanol                                               |          | [2]       |
| kratom products, <i>M. speciosa</i> and <i>M. hirsuta</i> dried leaves (Thailand) |             |             | 1.0–10.0 µg/mL<br>10–1000 ng/mL | MG<br>7-HMG<br>SPG<br>SPC<br>PAY                        | 0.8 ± 0.2–62.6 ± 1.6 mg/g<br>0.031 ± 0.004–0.393 ± 0.026 mg/g   | 0.08–6.3 %<br>0.003–0.04 %                                                                                                                      | betamethasone valerate             | HPLC-DAD, LC-ESI-MS  | Atlantis dC18  | A: water (10 mM ammonium formate, pH 3.5), B: methanol | 66 min   | [3]       |
| commercial products, police sample, fresh and dried leaves                        |             |             | 0.5 mg/mL                       | MG                                                      |                                                                 |                                                                                                                                                 |                                    | HPLC-UV-Vis, TLC     | Luna C18       | MeCN/0.01% ammonia (70:30, v/v), pH 10.3               | 20 min   | [4]       |
| leaf extracts, drinks, dried plants                                               | 0.25 µg/mL  | 0.50 µg/mL  | 0.5–10.0 µg/mL                  | MG                                                      | 0.80 ± 0.11–24.72 ± 0.67 mg/g, 30.95 ± 1.61–444.23 ± 3.55 µg/mL |                                                                                                                                                 |                                    | HPLC-DAD             | Inertsil C8    | MeCN:0.5% formic acid, pH 5 (50:50, v/v)               | 6 min    | [5]       |
| leaf extracts, commercial products                                                |             | 1 ng/mL     | 1–200 ng/mL                     | MG<br>7-HMG<br>SPG<br>SPC<br>PAY<br>COR<br>COX<br>COX-B |                                                                 | 0.7–38.7 % w/w<br>0.01–0.04 % w/w<br>0.1–5.3 % w/w<br>0.4–12.3 % w/w<br>0.3–12.8 % w/w<br>0.02–1.16 % w/w<br>0.03–2.75 % w/w<br>0.03–1.44 % w/w | phenacetin                         | UHPLC-ESI-MS/MS      | BEH C18        | A: water (10 mM ammonium acetate, pH 3.5), B: MeCN     | 22.5 min | [6]       |

|                                              |                           |           |                                  |                                             |                                                                                            |                    |
|----------------------------------------------|---------------------------|-----------|----------------------------------|---------------------------------------------|--------------------------------------------------------------------------------------------|--------------------|
|                                              | ICOR                      | 0.02–0.13 |                                  |                                             |                                                                                            |                    |
|                                              | MTP                       | < LLOQ    |                                  |                                             |                                                                                            |                    |
| leaf extract, alkaloid extract               | COX-B                     |           | UHPLC-API-MS-DAD, SFC-DAD, GC-MS | Zorbax RRHD SB-C8, Rx-SIL, DB-5MS           | A: water (10 mM ammonium acetate, pH 7.7), B: MeCN; CO2 with MeOH (10 mM ammonium acetate) | 35 min, 10 min [7] |
|                                              | COX                       |           |                                  |                                             |                                                                                            |                    |
|                                              | PAY                       |           |                                  |                                             |                                                                                            |                    |
|                                              | 3-IPAY                    |           |                                  |                                             |                                                                                            |                    |
|                                              | MG                        |           |                                  |                                             |                                                                                            |                    |
|                                              | SPG                       |           |                                  |                                             |                                                                                            |                    |
|                                              | SPC                       |           |                                  |                                             |                                                                                            |                    |
|                                              | 7-HMG                     |           |                                  |                                             |                                                                                            |                    |
| commercial leaves and products               | 7-HMG                     |           | UHPLC-ESI-MS/MS                  | Zorbax RRHD SB-C8                           | A: water (0.1% formic acid), B: MeCN (0.1% formic acid)                                    | 40 min [8]         |
|                                              | ISPF                      |           |                                  |                                             |                                                                                            |                    |
|                                              | ISPFE                     |           |                                  |                                             |                                                                                            |                    |
|                                              | IROF                      |           |                                  |                                             |                                                                                            |                    |
|                                              | COX-B                     |           |                                  |                                             |                                                                                            |                    |
|                                              | COX                       |           |                                  |                                             |                                                                                            |                    |
|                                              | 7 $\beta$ -hydroxy-7H-MTC |           |                                  |                                             |                                                                                            |                    |
|                                              | PAY                       |           |                                  |                                             |                                                                                            |                    |
|                                              | MG                        |           |                                  |                                             |                                                                                            |                    |
|                                              | SPG                       |           |                                  |                                             |                                                                                            |                    |
|                                              | 3-IPAY                    |           |                                  |                                             |                                                                                            |                    |
|                                              | SPC                       |           |                                  |                                             |                                                                                            |                    |
| commercial product, seized product "Krypton" | MG                        |           | CE-HRMS, CE-MS/MS                | capillary (50 $\mu$ m i.d., 67.5 cm length) | MeCN (58 mmol/L ammonium formate and 1.01 mol/L acetic acid)                               | [9]                |
|                                              | SPG                       |           |                                  |                                             |                                                                                            |                    |
|                                              | SPC                       |           |                                  |                                             |                                                                                            |                    |
|                                              | MTC                       |           |                                  |                                             |                                                                                            |                    |
|                                              | O-DMT                     |           |                                  |                                             |                                                                                            |                    |
|                                              | 7-HMG                     |           |                                  |                                             |                                                                                            |                    |

|                                     |             |                                |               |                |                                   |               |                 |                  |                                                         |          |      |
|-------------------------------------|-------------|--------------------------------|---------------|----------------|-----------------------------------|---------------|-----------------|------------------|---------------------------------------------------------|----------|------|
| leaves and local drink extracts     |             |                                |               | MG             |                                   | GC-MS, GC-FID | DB-5, HP-5      |                  |                                                         | [10]     |      |
| commercial products                 | 1 ng/mL     | 10–0.05 µg/mL                  |               | MG             | 9.7–19.0 µg/mg, 190.7–396.4 ng/µL | ondansetron   | UHPLC-ESI-MS/MS | BEH C18          |                                                         | [11]     |      |
|                                     |             |                                |               | 7-HMG          | 93.0–593.2 ng/mg, 1.96–2.51 ng/µL |               |                 |                  |                                                         |          |      |
| commercial products                 | 0.2 µg/mL   | 0.6 µg/mL                      | 1.0–500 µg/mL | MG             | 0.379–68.52 mg/g                  |               | HPLC-DAD        | Kinetex EVO C18  | A: water (5.0 mM ammonium bicarbonate, pH 9.5), B: MeCN | 18 min   | [12] |
|                                     | 0.4 µg/mL   | 1.1 µg/mL                      |               | 7-HMG          | 0.59–2.59 mg/g                    |               |                 |                  |                                                         |          |      |
| Malaysian <i>M. speciosa</i> leaves | 1 ng/mL     | 1–200 ng/mL                    |               | COX            | 0.03–0.46 mg/g                    | phenacetin    | UHPLC-ESI-MS/MS | BEH C18          | A: water (10 mM ammonium acetate, pH 3.5), B: MeCN      | 22.5 min | [13] |
|                                     |             |                                |               | COX-B          | 0.05–0.15 mg/g                    |               |                 |                  |                                                         |          |      |
|                                     |             |                                |               | ISPF           | 0.03 mg/g                         |               |                 |                  |                                                         |          |      |
|                                     |             |                                |               | MG oxindole B  | 0.05–0.21 mg/g                    |               |                 |                  |                                                         |          |      |
|                                     |             |                                |               | COR            | 0.03–0.42 mg/g                    |               |                 |                  |                                                         |          |      |
|                                     |             |                                |               | MG             | 9.38–18.85 mg/g                   |               |                 |                  |                                                         |          |      |
|                                     |             |                                |               | SPG            | 0.97–1.99 mg/g                    |               |                 |                  |                                                         |          |      |
|                                     |             |                                |               | PAY            | 0.01–1.90 mg/g                    |               |                 |                  |                                                         |          |      |
|                                     |             |                                |               | SPC            | 0.43–14.76 mg/g                   |               |                 |                  |                                                         |          |      |
|                                     |             |                                |               | SPC N(4)-oxide | 0.02–0.06 mg/g                    |               |                 |                  |                                                         |          |      |
|                                     |             |                                |               | 7-HMG          | 0.03–0.15 mg/g                    |               |                 |                  |                                                         |          |      |
|                                     |             |                                |               | ICOR           | 0.03–0.17 mg/g                    |               |                 |                  |                                                         |          |      |
|                                     |             |                                |               | AJM            |                                   |               |                 |                  |                                                         |          |      |
|                                     |             |                                |               | MTP            |                                   |               |                 |                  |                                                         |          |      |
| <i>M. speciosa</i> leaves           | 32.47 µg/mL | 32.92–250 µg/mL, 1.56–25 µg/mL |               | MG             | 8.96–56.26 mg/g, 8.45–55.52 mg/g  |               | ELISA, HPLC-DAD | Vertisep UPS C18 | water (5 mM phosphate buffer, pH 6.0):MeCN (35:65)      |          | [14] |
| commercial products                 |             | 0–750 µg/mL                    |               | MG             | 0.640–187 mg/g                    | thymol        | GC-MS           | Varian VF-5MS    |                                                         |          | [15] |
|                                     |             |                                |               | 7-HMG          |                                   |               |                 |                  |                                                         |          |      |
|                                     |             |                                |               | PAY            |                                   |               |                 |                  |                                                         |          |      |
|                                     |             |                                |               | SPC            |                                   |               |                 |                  |                                                         |          |      |
|                                     |             |                                |               | SPG            |                                   |               |                 |                  |                                                         |          |      |
|                                     |             |                                |               | COX A          |                                   |               |                 |                  |                                                         |          |      |

| COX-B                                          |                 |                                          |                           |                   |                                      |                                  |                                                   |                                                         |               |                |
|------------------------------------------------|-----------------|------------------------------------------|---------------------------|-------------------|--------------------------------------|----------------------------------|---------------------------------------------------|---------------------------------------------------------|---------------|----------------|
| commercial products                            |                 | 0.01–2 mg/g                              | MG                        | ca. 2–19 mg/g     | yohimbine                            | TLC, GC-MS                       | Agilent DB-5MS UI                                 |                                                         |               | [16]           |
| commercial products                            | 0.5 ng, 2 ng/mL | 6 ng/mL                                  | 0.1–5 ng/μL, 10–100 ng/mL | MG                | 0.03–862 μg/mL                       | IMS, HPLC-ESI-MS                 | Xbridge C18                                       | A: water (0.1% formic acid), B: MeCN (0.1% formic acid) | 20 min        | [17]           |
| commercial products                            |                 | 10 or 20 μg/mL, 10–100 ng/mL, 1–10 μg/mL | MG                        | 189–308 μg/mL     | 0.536–3.100 % w/w, 0.540–3.540 % w/w | GC-MS, HPLC-ESI-MS/MS, UHPLC-PDA | Agilent DB-5 MS, XBridge BEH C18, Acquity BEH C18 | A: water (0.1% formic acid), B: MeCN                    | 20 min, 7 min | [18]           |
| commercial products, <i>M. speciosa</i> leaves | 1.1 ng/mL       | 9.77–5000 ng/mL                          | IMTP                      | 0.943–1.47 mg/g   |                                      | UHPLC-ESI-HRMS                   | Kinetex F5                                        | A: water (0.1% formic acid), B: MeCN (0.1% formic acid) | 20 min        | Present method |
|                                                | 0.67            |                                          | 7-HMG                     | 0.1240–1.10 mg/g  |                                      |                                  |                                                   |                                                         |               |                |
|                                                | 0.79            |                                          | ISPFE                     | 0.382–1.675 mg/g  |                                      |                                  |                                                   |                                                         |               |                |
|                                                | 0.66            |                                          | SPF                       | 0.1222–5.90 mg/g  |                                      |                                  |                                                   |                                                         |               |                |
|                                                | 0.69            |                                          | COX                       | 0.2322–11.40 mg/g |                                      |                                  |                                                   |                                                         |               |                |
|                                                | 0.77            |                                          | COXE                      | 0.290–1.217 mg/g  |                                      |                                  |                                                   |                                                         |               |                |
|                                                | 1.0             |                                          | RYP                       | 0.0480–0.239 mg/g |                                      |                                  |                                                   |                                                         |               |                |
|                                                | 1.0             |                                          | AJM                       | 0.0262–0.883 mg/g |                                      |                                  |                                                   |                                                         |               |                |
|                                                | 1.5             |                                          | PAY                       | 5.79–70.4 mg/g    |                                      |                                  |                                                   |                                                         |               |                |
|                                                | 1.4             |                                          | MG                        | 0.53–270 mg/g     |                                      |                                  |                                                   |                                                         |               |                |
|                                                | 1.3             |                                          | SPG                       | 3.18–33.4 mg/g    |                                      |                                  |                                                   |                                                         |               |                |
|                                                | 0.94            |                                          | IPAY                      | 0.512–3.80 mg/g   |                                      |                                  |                                                   |                                                         |               |                |
|                                                | 0.59            |                                          | SPC                       | 3.68–41.7 mg/g    |                                      |                                  |                                                   |                                                         |               |                |
|                                                | 0.70            |                                          | MTC                       | 0.647–4.75 mg/g   |                                      |                                  |                                                   |                                                         |               |                |

Abbreviations: MG, mitragynine; 7-HMG, 7-hydroxymitragynine; SPG, speciogynine; SPC, speciociliatine; MTC, mitraciliatine; PAY, paynantheine; IPAY, isopaynantheine; COR, corynantheidine; ICOR, isocorynantheidine; COX, corynoxine; COX-B, corynoxine B; COXE, corynoxine; MTP, mitraphylline; IMTP, isomitraphylline; AJM; ajmalicine; SPF, speciofoline; ISPF, isospeciofoline; ISPFE, isospeciofoleine; IROF, isorotundifoline; RYP, rhynchophylline; O-DMT, O-desmethyltramadol; HPLC, high performance liquid chromatography; UHPLC, ultra-high performance liquid chromatography; TLC, thin-layer chromatography; CE, capillary electrophoresis; GC, gas chromatography; SFC, supercritical fluid chromatography; DART, direct analysis in real time; DAD, diode array detector; PDA, photodiode array detector; UV-Vis, ultraviolet-visible light detector; FID, flame ionization detector; MeCN, acetonitrile; CO<sub>2</sub>, carbon dioxide; MS, mass spectrometry; MS/MS, tandem mass spectrometry; IMS, ion mobility spectrometry; HR, high resolution; API, atmospheric pressure ionization; ESI, electrospray ionization; ELISA, enzyme-linked immunosorbent assay.

Refer to Kerrigan et al. [19] for analytical methods that identify and quantify *Mitragyna* alkaloids in biological matrices.

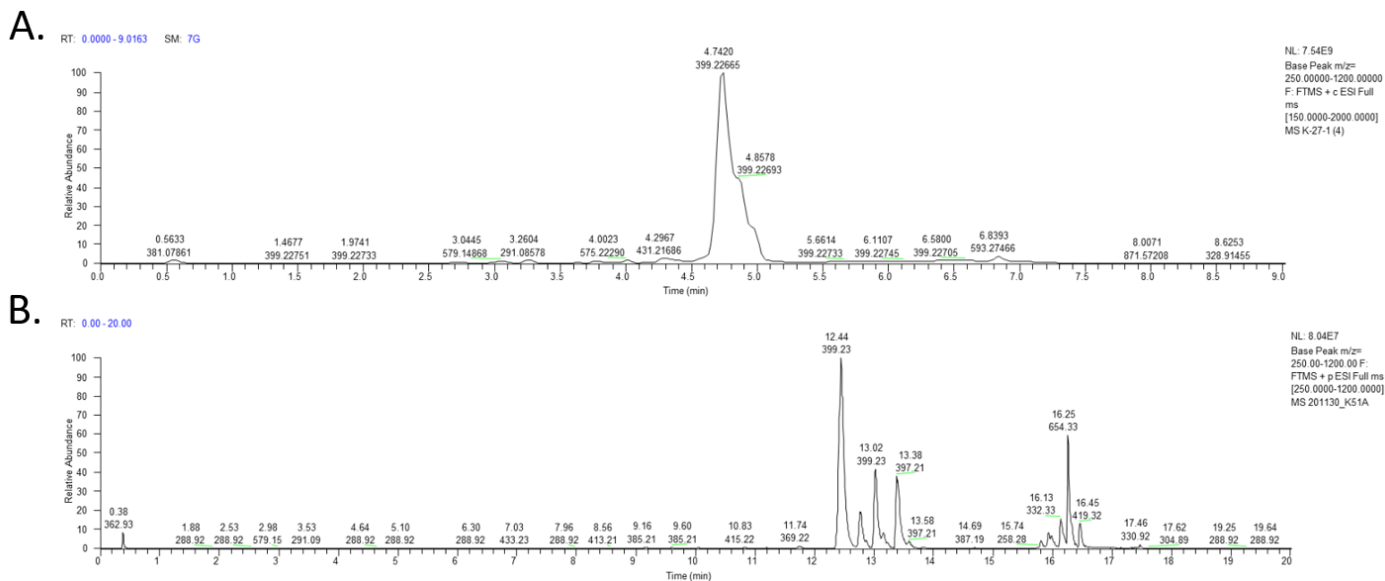

**Fig. 1S** Comparison of a kratom extract analyzed using a generic screening method with a BEH C18 column (A) and the developed method using a Kinetex F5 column (B).

**Table 2S** Intraday and interday precision (as measured by RSD) and accuracy (as measured by RE) of the method for kratom alkaloid quantification.

| Analyte                     | Concentration of standard solution (ng/mL) | Intraday             |                     | Interday             |                     |
|-----------------------------|--------------------------------------------|----------------------|---------------------|----------------------|---------------------|
|                             |                                            | RSD <sup>a</sup> (%) | RE <sup>b</sup> (%) | RSD <sup>a</sup> (%) | RE <sup>b</sup> (%) |
| isomitrephylline<br>(1)     | 5000                                       | 1.8                  | 1.6                 | 6.8                  | 4.4                 |
|                             | 2500                                       | 0.90                 | 7.6                 | 5.8                  | 5.0                 |
|                             | 1250                                       | 0.30                 | 7.4                 | 5.8                  | 2.7                 |
|                             | 625                                        | 1.7                  | 1.8                 | 4.9                  | 0.88                |
|                             | 313                                        | 1.3                  | 2.6                 | 7.3                  | 1.0                 |
|                             | 156                                        | 2.2                  | 5.4                 | 10                   | 5.5                 |
|                             | 78.1                                       | 1.1                  | 3.2                 | 4.4                  | 0.59                |
|                             | 39.1                                       | 2.2                  | 10                  | 4.9                  | 6.4                 |
|                             | 19.5                                       | 1.0                  | 0.70                | 4.3                  | 3.6                 |
|                             | 9.77                                       | 2.9                  | 3.6                 | 3.1                  | 3.7                 |
| 7-hydroxymitragynine<br>(2) | 2500                                       | 2.7                  | 4.5                 | 5.8                  | 1.4                 |
|                             | 1250                                       | 5.2                  | 2.7                 | 4.5                  | 3.3                 |
|                             | 625                                        | 6.9                  | 6.4                 | 6.8                  | 3.4                 |
|                             | 313                                        | 5.2                  | 4.9                 | 6.2                  | 6.6                 |
|                             | 156                                        | 11                   | 11                  | 9.9                  | 2.9                 |
|                             | 78.1                                       | 3.8                  | 1.9                 | 6.3                  | 1.3                 |
|                             | 39.1                                       | 4.7                  | 6.9                 | 6.3                  | 7.4                 |
|                             | 19.5                                       | 1.0                  | 1.4                 | 4.0                  | 4.4                 |
|                             | 9.77                                       | 1.8                  | 3.1                 | 3.3                  | 4.1                 |
|                             | isospeciofoleine<br>(3)                    | 2500                 | 7.3                 | 0.043                | 7.4                 |
| 1250                        |                                            | 3.6                  | 3.3                 | 4.4                  | 4.3                 |
| 625                         |                                            | 5.1                  | 7.7                 | 6.5                  | 5.0                 |
| 313                         |                                            | 3.6                  | 5.2                 | 5.6                  | 6.5                 |
| 156                         |                                            | 12                   | 8.9                 | 9.8                  | 3.8                 |
| 78.1                        |                                            | 2.1                  | 1.4                 | 7.2                  | 3.0                 |
| 39.1                        |                                            | 2.4                  | 7.1                 | 5.9                  | 8.5                 |
| 19.5                        |                                            | 0.39                 | 2.0                 | 3.4                  | 4.9                 |
| 9.77                        |                                            | 2.1                  | 3.2                 | 3.0                  | 4.9                 |
| speciofoleine<br>(6)        |                                            | 5000                 | 1.6                 | 7.4                  | 7.0                 |
|                             | 2500                                       | 0.24                 | 0.92                | 4.6                  | 1.6                 |
|                             | 1250                                       | 0.41                 | 5.8                 | 3.6                  | 4.1                 |



|                        |      |      |      |     |      |
|------------------------|------|------|------|-----|------|
|                        | 625  | 1.0  | 7.4  | 5.9 | 3.3  |
|                        | 313  | 0.60 | 4.0  | 6.7 | 4.6  |
|                        | 156  | 1.1  | 0.36 | 11  | 4.0  |
|                        | 78.1 | 0.36 | 2.7  | 5.6 | 0.36 |
|                        | 39.1 | 4.3  | 9.8  | 5.9 | 6.5  |
|                        | 19.5 | 1.0  | 0.8  | 4.5 | 3.6  |
|                        | 9.77 | 1.7  | 3.0  | 3.8 | 3.5  |
|                        | 2500 | 0.90 | 5.4  | 5.8 | 3.4  |
|                        | 1250 | 1.3  | 2.6  | 3.9 | 1.6  |
|                        | 625  | 1.0  | 6.7  | 6.4 | 2.9  |
| corynoxine A<br>(7)    | 313  | 1.1  | 5.3  | 6.8 | 6.9  |
|                        | 156  | 0.95 | 2.0  | 11  | 1.5  |
|                        | 78.1 | 0.84 | 3.0  | 6.8 | 0.44 |
|                        | 39.1 | 3.8  | 9.9  | 6.0 | 6.0  |
|                        | 19.5 | 0.84 | 1.5  | 4.9 | 4.3  |
|                        | 9.77 | 1.7  | 3.2  | 3.7 | 3.4  |
|                        | 5000 | 1.2  | 0.4  | 6.1 | 3.8  |
|                        | 2500 | 1.1  | 6.6  | 4.9 | 4.9  |
|                        | 1250 | 1.1  | 6.7  | 3.7 | 4.4  |
|                        | 625  | 0.28 | 3.8  | 4.9 | 0.7  |
| corynoxine<br>(8)      | 313  | 1.0  | 0.64 | 6.2 | 2.3  |
|                        | 156  | 1.4  | 2.3  | 11  | 5.8  |
|                        | 78.1 | 1.2  | 5.6  | 6.2 | 2.7  |
|                        | 39.1 | 5.1  | 12   | 6.3 | 7.5  |
|                        | 19.5 | 0.81 | 2.6  | 4.7 | 5.1  |
|                        | 9.77 | 1.8  | 4.9  | 3.0 | 5.0  |
|                        | 2500 | 1.8  | 7.3  | 8.0 | 1.4  |
|                        | 1250 | 0.12 | 0.74 | 5.8 | 1.3  |
|                        | 625  | 0.68 | 8.1  | 7.8 | 1.7  |
| rhyrchophylline<br>(9) | 313  | 0.63 | 6.0  | 7.3 | 7.0  |
|                        | 156  | 0.17 | 1.9  | 13  | 3.8  |
|                        | 78.1 | 0.54 | 1.3  | 8.9 | 2.2  |
|                        | 39.1 | 5.3  | 10   | 7.2 | 6.1  |
|                        | 19.5 | 0.20 | 0.34 | 7.2 | 4.3  |
|                        | 9.77 | 2.6  | 2.5  | 5.0 | 3.4  |
| ajmalicine             | 5000 | 6.1  | 3.1  | 7.7 | 4.5  |

|                             |      |      |       |     |        |
|-----------------------------|------|------|-------|-----|--------|
| <b>(10)</b>                 | 2500 | 0.76 | 5.1   | 4.9 | 1.3    |
|                             | 1250 | 2.4  | 5.1   | 3.4 | 4.9    |
|                             | 625  | 5.9  | 2.6   | 5.8 | 2.6    |
|                             | 313  | 3.7  | 4.8   | 8.3 | 6.4    |
|                             | 156  | 14   | 14    | 12  | 2.8    |
|                             | 78.1 | 2.6  | 1.9   | 7.1 | 0.11   |
|                             | 39.1 | 6.0  | 6.8   | 7.6 | 6.8    |
|                             | 19.5 | 2.0  | 0.68  | 7.6 | 4.9    |
|                             | 9.77 | 2.7  | 2.9   | 5.1 | 4.1    |
| paynantheine<br><b>(11)</b> | 2500 | 1.2  | 7.4   | 5.8 | 4.1    |
|                             | 1250 | 1.3  | 0.66  | 5.4 | 0.17   |
|                             | 625  | 0.66 | 2.5   | 6.0 | 0.0064 |
|                             | 313  | 0.19 | 3.7   | 7.4 | 5.5    |
|                             | 156  | 0.57 | 3.2   | 12  | 1.7    |
|                             | 78.1 | 1.1  | 3.1   | 7.3 | 4.1    |
|                             | 39.1 | 5.7  | 6.8   | 7.3 | 2.7    |
|                             | 19.5 | 0.73 | 2.7   | 7.7 | 2.6    |
|                             | 9.77 | 4.3  | 0.37  | 4.6 | 1.4    |
| mitragynine<br><b>(12)</b>  | 5000 | 0.24 | 11    | 8.5 | 3.4    |
|                             | 2500 | 1.2  | 1.3   | 5.5 | 0.11   |
|                             | 1250 | 0.81 | 4.1   | 5.7 | 2.7    |
|                             | 625  | 1.2  | 4.2   | 5.7 | 0.64   |
|                             | 313  | 1.4  | 4.3   | 8.4 | 4.9    |
|                             | 156  | 1.3  | 1.6   | 14  | 3.2    |
|                             | 78.1 | 0.95 | 2.6   | 8.3 | 3.0    |
|                             | 39.1 | 4.6  | 7.3   | 7.5 | 3.7    |
|                             | 19.5 | 0.59 | 2.1   | 8.4 | 3.3    |
| 9.77                        | 4.1  | 0.11 | 4.7   | 2.2 |        |
| speciogynine<br><b>(13)</b> | 2500 | 2.7  | 2.8   | 7.4 | 1.5    |
|                             | 1250 | 1.0  | 6.9   | 5.4 | 8.3    |
|                             | 625  | 1.6  | 10    | 6.9 | 3.1    |
|                             | 313  | 0.30 | 2.1   | 11  | 3.6    |
|                             | 156  | 0.52 | 3.6   | 12  | 8.0    |
|                             | 78.1 | 1.3  | 4.4   | 8.0 | 1.5    |
|                             | 39.1 | 6.2  | 12    | 8.3 | 7.0    |
|                             | 19.5 | 1.3  | 0.043 | 8.1 | 4.4    |
|                             | 9.77 | 3.2  | 3.5   | 5.0 | 4.4    |

|                         |      |      |      |     |        |
|-------------------------|------|------|------|-----|--------|
|                         | 2500 | 4.4  | 2.6  | 7.8 | 5.8    |
|                         | 1250 | 5.5  | 2.2  | 5.8 | 0.27   |
|                         | 625  | 6.1  | 3.1  | 7.9 | 0.24   |
| isopaynantheine<br>(14) | 313  | 3.4  | 3.4  | 8.7 | 5.4    |
|                         | 156  | 17   | 12   | 14  | 0.0020 |
|                         | 78.1 | 1.2  | 2.5  | 9.8 | 6.1    |
|                         | 39.1 | 7.3  | 3.2  | 8.2 | 3.0    |
|                         | 19.5 | 2.8  | 0.13 | 7.5 | 4.9    |
|                         | 9.77 | 2.7  | 1.0  | 4.0 | 2.3    |
|                         | 2500 | 2.2  | 1.2  | 9.8 | 2.5    |
|                         | 1250 | 2.9  | 7.8  | 6.2 | 4.1    |
|                         | 625  | 1.0  | 5.5  | 7.4 | 1.9    |
| speciociliatine<br>(15) | 313  | 1.3  | 1.8  | 11  | 6.6    |
|                         | 156  | 1.0  | 2.7  | 14  | 3.6    |
|                         | 78.1 | 1.3  | 4.8  | 11  | 1.3    |
|                         | 39.1 | 6.4  | 11   | 12  | 6.0    |
|                         | 19.5 | 1.2  | 1.9  | 8.7 | 6.2    |
|                         | 9.77 | 1.5  | 4.3  | 3.7 | 4.4    |
|                         | 2500 | 5.1  | 3.0  | 8.3 | 1.6    |
|                         | 1250 | 7.0  | 4.4  | 7.9 | 2.5    |
|                         | 625  | 1.1  | 7.0  | 5.9 | 2.8    |
| mitraciliatine<br>(16)  | 313  | 2.6  | 3.8  | 7.8 | 6.7    |
|                         | 156  | 2.5  | 0.20 | 12  | 2.9    |
|                         | 78.1 | 0.88 | 2.8  | 9.6 | 1.0    |
|                         | 39.1 | 6.9  | 11   | 9.0 | 7.3    |
|                         | 19.5 | 1.3  | 1.7  | 6.6 | 5.6    |
|                         | 9.77 | 1.8  | 3.8  | 2.8 | 4.4    |

<sup>a</sup> relative standard deviation (RSD) = 100% ×  $\left(\frac{s_i}{\bar{x}}\right)$

$$\text{standard deviation } (s_i) = \sqrt{\frac{\sum(x_i - \bar{x})^2}{(n-1)}}$$

<sup>b</sup> relative error (RE) =  $\left|\frac{\bar{x}_i - x_t}{x_t}\right| \times 100\%$

$\bar{x}_i$  = mean of the actual values observed

$x_t$  = true (or nominal) value

**Table 3S** Concentration ( $\mu\text{g/mL}$ ) and Percent recovery (%) of internal standard mitragynine- $d_3$ , which was added to all solutions at a concentration of  $125 \mu\text{g/mL}$ .

| Sample | Conc. ( $\mu\text{g/mL}$ ) | % Recovery |
|--------|----------------------------|------------|
| K49    | 109                        | 88         |
| K51    | 120                        | 96         |
| K52    | 110                        | 88         |
| K55    | 115                        | 92         |
| K59    | 114                        | 91         |
| K76    | 111                        | 89         |
| K77    | 114                        | 91         |

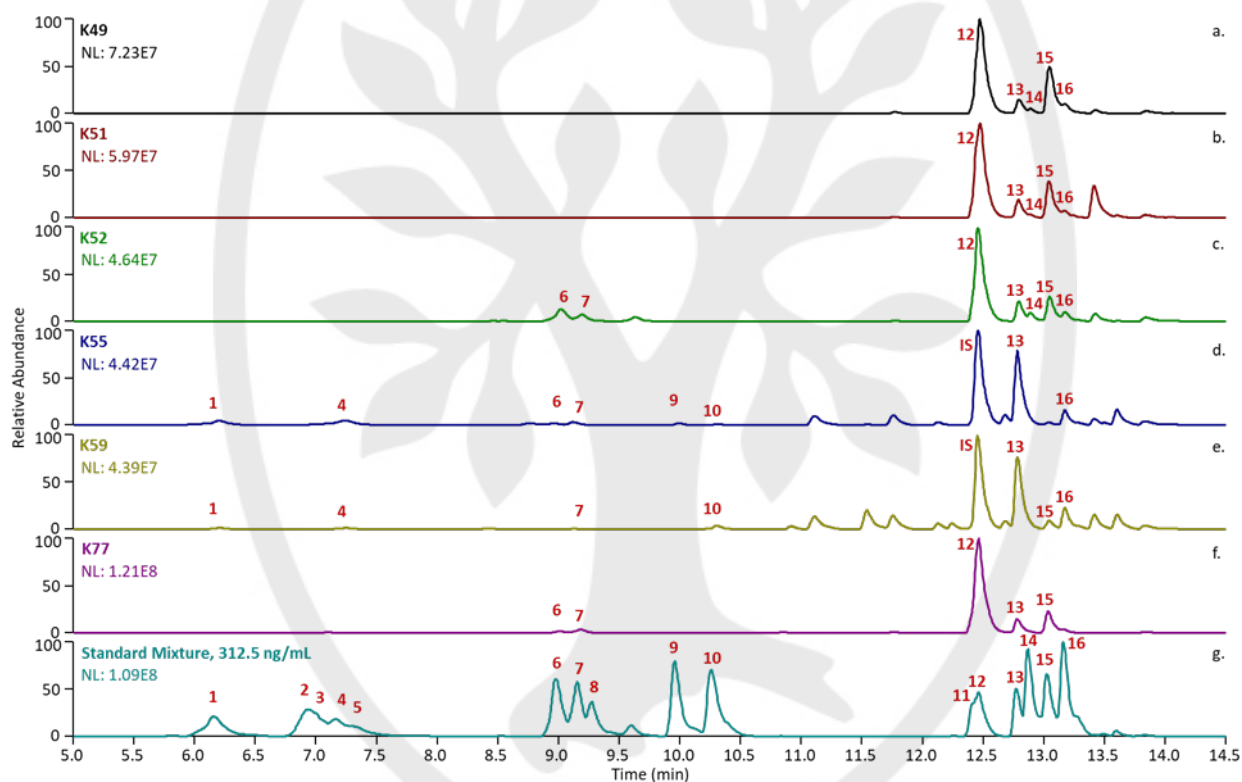

**Figure 2S** Base peak MS chromatograms representing the methanolic extracts of kratom material quantified in Table 2. Specifically, from top to bottom, (panel a) a commercial kratom powder (K49), (panel b) a commercial kratom powder (K51), (panel c) a high-speciofoline containing commercial kratom powder (K52), (panel d) a UNCG grown kratom cutting “Rifat” (K55), (panel e) an Ohio grown kratom cutting “Rifat” (K59), (panel f) a commercial kratom pill, and (panel g) an equimolar mixture of kratom alkaloids at  $313 \text{ ng/mL}$ . Structures corresponding to each peak (Figs. 1 and 2) were assigned by matching retention time, fragmentation pattern, and accurate mass with authentic standards. Compounds are numbered in order of elution. NL is the normalization level, i.e., the base peak intensity.

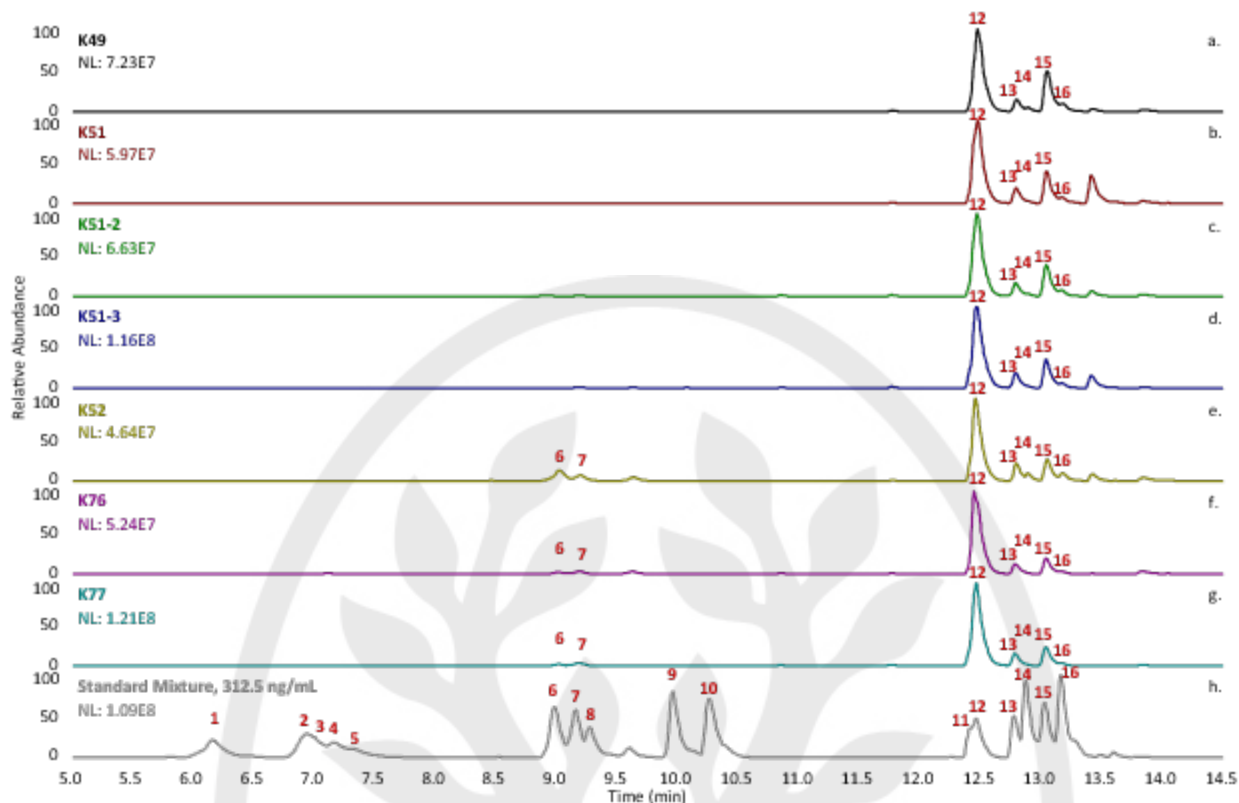

**Figure 3S** Base peak MS chromatograms representing the extracts of kratom material quantified in Table 3. Specifically, from top to bottom, (panel a) a methanolic extract of a commercial kratom powder (K49), (panel b) a methanolic extract of a commercial kratom powder (K51), (panel c) the alkaloidal partition from a  $\text{CHCl}_3$ -MeOH extract of K51 (K51-2), (panel d) a hot water (tea) extract of K51 (K51-3), (panel e) a high-speciofoline containing methanolic extract of commercial kratom powder (K52), (panel f) a liquid kratom product (K76), (panel g) a methanolic extract of a commercial kratom pill, and (panel h) an equimolar mixture of kratom alkaloids at 313 ng/mL. Structures corresponding to each peak (Figs. 1 and 2) were assigned by matching retention time, fragmentation pattern, and accurate mass with authentic standards. Compounds are numbered in order of elution. NL is the normalization level, i.e., the base peak intensity.

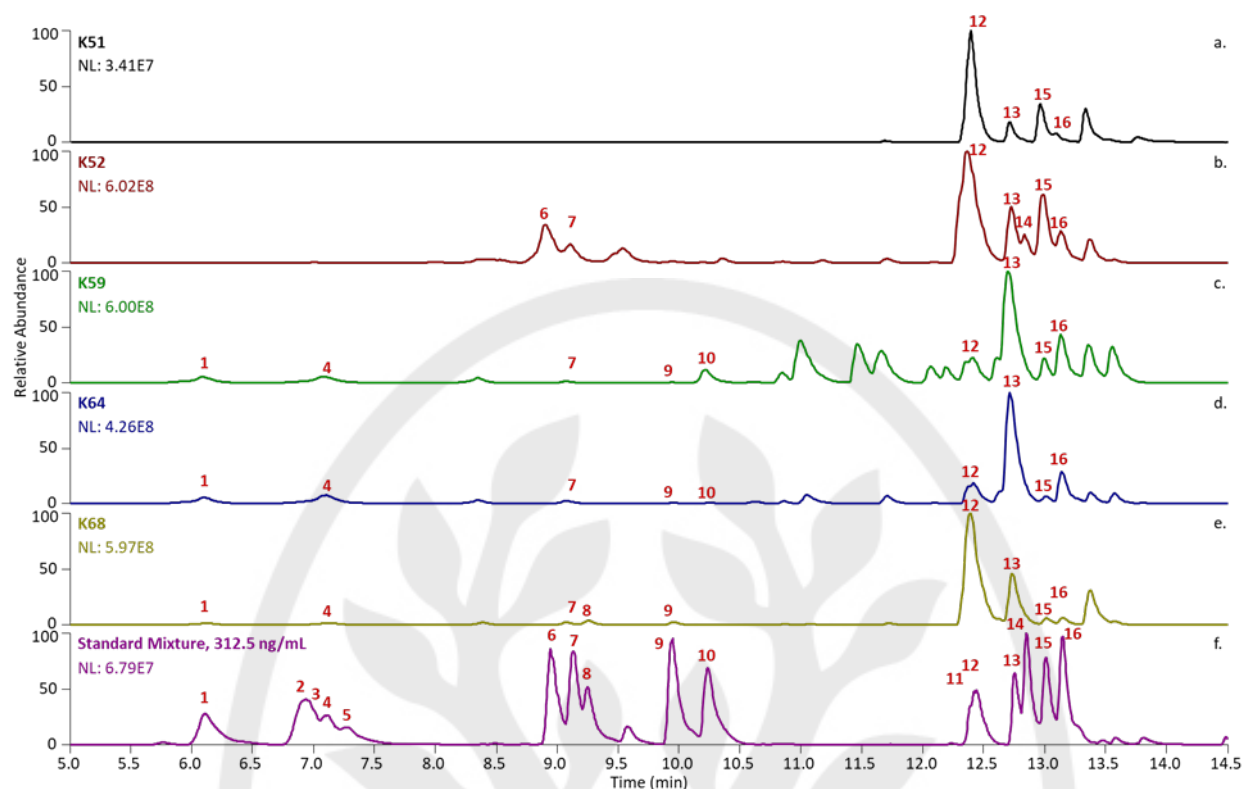

**Figure 4S** Base peak MS chromatograms representing the methanolic extracts of kratom material quantified in Table 4. Specifically, from top to bottom, (panel a) a commercial kratom powder (K51), (panel b) a high-speciofoline containing commercial kratom powder (K52), (panel c) an Ohio grown kratom cutting “Rifat” (K59), (panel d) a UNCG grown kratom cutting “Rifat” (K64), (panel e) a UNCG grown kratom seedling (K68), and (panel f) an equimolar mixture of kratom alkaloids at 313 ng/mL. Structures corresponding to each peak (Figs. 1 and 2) were assigned by matching retention time, fragmentation pattern, and accurate mass with authentic standards. Compounds are numbered in order of elution. NL is the normalization level, i.e., the base peak intensity.

**Table 4S** Literature references for purchased indole and oxindole alkaloid standards.

| Compound                          | Reference(s) |
|-----------------------------------|--------------|
| 7-hydroxymitragynine ( <b>2</b> ) | [20]         |
| ajmalicine ( <b>10</b> )          | [21, 22]     |
| isomitraphylline ( <b>1</b> )     | [23, 24]     |
| speciophylline ( <b>5</b> )       | [24]         |
| mitraphylline ( <b>4</b> )        | [23, 24]     |
| rhynchophylline ( <b>9</b> )      | [25]         |

**Table 5S** Commercial kratom products and *M. speciosa* specimens analyzed in this study.

| Code | Product Name      | Purported Origin                                                  | Description                           | Voucher     | GenBank # for ITS     |
|------|-------------------|-------------------------------------------------------------------|---------------------------------------|-------------|-----------------------|
| K49  | Green Maeng Da    | Thailand                                                          | Cut leaf; low speciofoline group      | -           | MT111840,<br>MT111841 |
| K51  | Yellow Indonesian | Indonesia                                                         | Powder; low speciofoline group        | -           | MT586314              |
| K52  | White Jongkong    | Jongkong, West Kalimantan, Indonesia                              | Powder; high speciofoline group       | -           | MT111842,<br>MT111843 |
| K76  | Kratom Extract    | Unknown                                                           | Liquid; leaf extract 50:1             | -           | -                     |
| K77  | Botanical Extract | Unknown                                                           | Capsule; powdered extract 50:1        | -           | -                     |
| K55  | Living UNCG plant | Cutting from Ohio grown mother tree                               | Rifat, <i>ca.</i> 9-month-old         | NCU00433756 | MT586315              |
| K59  | Living Ohio plant | Leaves from Ohio grown mother tree                                | Rifat, <i>ca.</i> 7-year-old          | -           | -                     |
| K64  | Living UNCG plant | Cutting from US supplier grown "Rifat"                            | Rifat, <i>ca.</i> 8-month-old         | NCU00675498 | OM181964              |
| K68  | Living UNCG plant | Mempawah, West Kalimantan,<br>Indonesia seedling from US supplier | Borneo seedling, <i>ca.</i> 14 months | NCU00675499 | OM181965              |

Products K49, K51, K52, and K55 were identified previously as *M. speciosa* [26, 27].

Other reports [Distance tree of results](#) [MSA viewer](#) [Filter](#) [Reset](#)

Descriptions [Graphic Summary](#) [Alignments](#) [Taxonomy](#)

Sequences producing significant alignments [Download](#) [Select columns](#) Show 100 [?](#)

select all 100 sequences selected [GenBank](#) [Graphics](#) [Distance tree of results](#) [MSA Viewer](#)

|                                     | Description                                                                                                                            | Scientific Name                       | Max Score | Total Score | Query Cover | E value | Per. Ident | Acc. Len | Accession  |
|-------------------------------------|----------------------------------------------------------------------------------------------------------------------------------------|---------------------------------------|-----------|-------------|-------------|---------|------------|----------|------------|
| <input checked="" type="checkbox"/> | <a href="#">Mitragyna speciosa isolation-source red-veined variety 18S ribosomal RNA gene, partial sequence: internal trans...</a>     | <a href="#">Mitragyna speciosa</a>    | 948       | 948         | 100%        | 0.0     | 99.24%     | 744      | JF412826.1 |
| <input checked="" type="checkbox"/> | <a href="#">Mitragyna speciosa clone K51 Indonesian small subunit ribosomal RNA gene, partial sequence: internal transcrib...</a>      | <a href="#">Mitragyna speciosa</a>    | 942       | 942         | 100%        | 0.0     | 99.05%     | 692      | MT586314.1 |
| <input checked="" type="checkbox"/> | <a href="#">Mitragyna speciosa strain White Jongkong clone K52_2 small subunit ribosomal RNA gene, partial sequence: int...</a>        | <a href="#">Mitragyna speciosa</a>    | 942       | 942         | 100%        | 0.0     | 99.05%     | 707      | MT111843.1 |
| <input checked="" type="checkbox"/> | <a href="#">Mitragyna speciosa strain White Jongkong clone K52_1 small subunit ribosomal RNA gene, partial sequence: int...</a>        | <a href="#">Mitragyna speciosa</a>    | 942       | 942         | 100%        | 0.0     | 99.05%     | 710      | MT111842.1 |
| <input checked="" type="checkbox"/> | <a href="#">Mitragyna speciosa strain Green Maeng Da clone K49_1 small subunit ribosomal RNA gene, partial sequence: in...</a>         | <a href="#">Mitragyna speciosa</a>    | 942       | 942         | 100%        | 0.0     | 99.05%     | 703      | MT111840.1 |
| <input checked="" type="checkbox"/> | <a href="#">Mitragyna speciosa G13 genes for ITS1, 5.8S rRNA, ITS2, partial and complete sequence</a>                                  | <a href="#">Mitragyna speciosa</a>    | 937       | 937         | 98%         | 0.0     | 99.42%     | 625      | LC514373.1 |
| <input checked="" type="checkbox"/> | <a href="#">Mitragyna speciosa MUS-5603-3 genes for ITS1, 5.8S rRNA, ITS2, partial and complete sequence</a>                           | <a href="#">Mitragyna speciosa</a>    | 937       | 937         | 98%         | 0.0     | 99.42%     | 608      | LC504152.1 |
| <input checked="" type="checkbox"/> | <a href="#">Mitragyna speciosa MUS-5603-2 genes for ITS1, 5.8S rRNA, ITS2, partial and complete sequence</a>                           | <a href="#">Mitragyna speciosa</a>    | 937       | 937         | 98%         | 0.0     | 99.42%     | 608      | LC504148.1 |
| <input checked="" type="checkbox"/> | <a href="#">Mitragyna speciosa MUS-5603-1 genes for ITS1, 5.8S rRNA, ITS2, partial and complete sequence</a>                           | <a href="#">Mitragyna speciosa</a>    | 937       | 937         | 98%         | 0.0     | 99.42%     | 608      | LC504144.1 |
| <input checked="" type="checkbox"/> | <a href="#">Mitragyna speciosa MUS-5602-2 genes for ITS1, 5.8S rRNA, ITS2, partial and complete sequence</a>                           | <a href="#">Mitragyna speciosa</a>    | 937       | 937         | 98%         | 0.0     | 99.42%     | 608      | LC504140.1 |
| <input checked="" type="checkbox"/> | <a href="#">Mitragyna speciosa MUS-5602-1 genes for ITS1, 5.8S rRNA, ITS2, partial and complete sequence</a>                           | <a href="#">Mitragyna speciosa</a>    | 937       | 937         | 98%         | 0.0     | 99.42%     | 608      | LC504136.1 |
| <input checked="" type="checkbox"/> | <a href="#">Mitragyna speciosa MUS-5601-4 genes for ITS1, 5.8S rRNA, ITS2, partial and complete sequence</a>                           | <a href="#">Mitragyna speciosa</a>    | 937       | 937         | 98%         | 0.0     | 99.42%     | 608      | LC504132.1 |
| <input checked="" type="checkbox"/> | <a href="#">Mitragyna speciosa MUS-5512-3 genes for ITS1, 5.8S rRNA, ITS2, partial and complete sequence</a>                           | <a href="#">Mitragyna speciosa</a>    | 937       | 937         | 98%         | 0.0     | 99.42%     | 608      | LC504128.1 |
| <input checked="" type="checkbox"/> | <a href="#">Mitragyna speciosa MUS-5601-3 genes for ITS1, 5.8S rRNA, ITS2, partial and complete sequence</a>                           | <a href="#">Mitragyna speciosa</a>    | 937       | 937         | 98%         | 0.0     | 99.42%     | 608      | LC504124.1 |
| <input checked="" type="checkbox"/> | <a href="#">Mitragyna speciosa MUS-5601-2 genes for ITS1, 5.8S rRNA, ITS2, partial and complete sequence</a>                           | <a href="#">Mitragyna speciosa</a>    | 937       | 937         | 98%         | 0.0     | 99.42%     | 608      | LC504120.1 |
| <input checked="" type="checkbox"/> | <a href="#">Mitragyna speciosa MUS-5601-1 genes for ITS1, 5.8S rRNA, ITS2, partial and complete sequence</a>                           | <a href="#">Mitragyna speciosa</a>    | 937       | 937         | 98%         | 0.0     | 99.42%     | 608      | LC504116.1 |
| <input checked="" type="checkbox"/> | <a href="#">Mitragyna speciosa MUS-5512-2 genes for ITS1, 5.8S rRNA, ITS2, partial and complete sequence</a>                           | <a href="#">Mitragyna speciosa</a>    | 937       | 937         | 98%         | 0.0     | 99.42%     | 608      | LC504112.1 |
| <input checked="" type="checkbox"/> | <a href="#">Mitragyna speciosa genes for ITS1, 5.8S rRNA, ITS2, partial and complete sequence</a>                                      | <a href="#">Mitragyna speciosa</a>    | 937       | 937         | 98%         | 0.0     | 99.42%     | 608      | AB249645.1 |
| <input checked="" type="checkbox"/> | <a href="#">Mitragyna speciosa strain Green Maeng Da clone K49_2 small subunit ribosomal RNA gene, partial sequence: in...</a>         | <a href="#">Mitragyna speciosa</a>    | 935       | 935         | 99%         | 0.0     | 99.23%     | 665      | MT111841.1 |
| <input checked="" type="checkbox"/> | <a href="#">Mitragyna parvifolia isolate MPF3 internal transcribed spacer 1, partial sequence: 5.8S ribosomal RNA gene, co...</a>      | <a href="#">Mitragyna parvif...</a>   | 905       | 905         | 99%         | 0.0     | 98.08%     | 586      | JX856480.1 |
| <input checked="" type="checkbox"/> | <a href="#">Mitragyna parvifolia voucher Fagerlind &amp; Klackenborg 400 (S) internal transcribed spacer 1, partial sequence: 5...</a> | <a href="#">Mitragyna parvif...</a>   | 894       | 894         | 97%         | 0.0     | 98.24%     | 556      | KC737617.1 |
| <input checked="" type="checkbox"/> | <a href="#">Mitragyna inermis 5.8S rRNA gene, internal transcribed spacer 1 (ITS1) and internal transcribed spacer 2 (ITS2)</a>        | <a href="#">Mitragyna inermis</a>     | 891       | 891         | 97%         | 0.0     | 98.05%     | 608      | AJ346873.1 |
| <input checked="" type="checkbox"/> | <a href="#">Mitragyna hirsuta MUS-5604-3 genes for ITS1, 5.8S rRNA, ITS2, partial and complete sequence</a>                            | <a href="#">Mitragyna hirsuta</a>     | 889       | 889         | 97%         | 0.0     | 98.05%     | 607      | LC504184.1 |
| <input checked="" type="checkbox"/> | <a href="#">Mitragyna hirsuta MUS-5603-5 genes for ITS1, 5.8S rRNA, ITS2, partial and complete sequence</a>                            | <a href="#">Mitragyna hirsuta</a>     | 889       | 889         | 97%         | 0.0     | 98.05%     | 607      | LC504180.1 |
| <input checked="" type="checkbox"/> | <a href="#">Mitragyna hirsuta MUS-5603-4 genes for ITS1, 5.8S rRNA, ITS2, partial and complete sequence</a>                            | <a href="#">Mitragyna hirsuta</a>     | 889       | 889         | 97%         | 0.0     | 98.05%     | 607      | LC504176.1 |
| <input checked="" type="checkbox"/> | <a href="#">Mitragyna diversifolia MUS-5603-3 genes for ITS1, 5.8S rRNA, ITS2, partial and complete sequence</a>                       | <a href="#">Mitragyna diversif...</a> | 889       | 889         | 97%         | 0.0     | 98.05%     | 607      | LC504172.1 |

**Fig. 5S** Graphical overview of the BLAST results (January 2022) in NCBI GenBank database using Internal Transcribed Spacer (ITS) region. Sample K64 shows  $\geq 99\%$  similarity with *Mitragyna speciosa*. The ITS sequence of K64 shows high homology with *M. speciosa* samples identified previously (K49, K51 and K52) [26, 27]. One sample, K55 showed  $\geq 98\%$  similarity with ITS data, but did not group with other *M. speciosa* samples in the ITS phylogeny, and showed phylogenetic affiliation with *M. speciosa* samples based on combined *matK* and *trnH-psbA* regions [27].



Other reports [Distance tree of results](#) [MSA viewer](#) [?](#)

Filter

Reset

| Descriptions                                                                                                                          |                                                                                                                                                                                                        | Graphic Summary                     | Alignments | Taxonomy    |             |         |            |          |                            |
|---------------------------------------------------------------------------------------------------------------------------------------|--------------------------------------------------------------------------------------------------------------------------------------------------------------------------------------------------------|-------------------------------------|------------|-------------|-------------|---------|------------|----------|----------------------------|
| <b>Sequences producing significant alignments</b>                                                                                     |                                                                                                                                                                                                        |                                     |            |             |             |         |            |          |                            |
| Download <span>▼</span> <span>New</span> Select columns <span>▼</span> Show <span>100</span> <span>▼</span> <span>?</span>            |                                                                                                                                                                                                        |                                     |            |             |             |         |            |          |                            |
| <input checked="" type="checkbox"/> select all 100 sequences selected                                                                 |                                                                                                                                                                                                        |                                     |            |             |             |         |            |          |                            |
| <a href="#">GenBank</a> <a href="#">Graphics</a> <a href="#">Distance tree of results</a> <span>New</span> <a href="#">MSA Viewer</a> |                                                                                                                                                                                                        |                                     |            |             |             |         |            |          |                            |
|                                                                                                                                       | Description                                                                                                                                                                                            | Scientific Name                     | Max Score  | Total Score | Query Cover | E value | Per. Ident | Acc. Len | Accession                  |
| <input checked="" type="checkbox"/>                                                                                                   | <a href="#">Mitragnya speciosa strain White Jongkong clone K52_1 small subunit ribosomal RNA gene, partial sequence; internal transcribed spacer 1, 5.8S rRNA, ITS2, partial and complete sequence</a> | <a href="#">Mitragnya speciosa</a>  | 1303       | 1303        | 100%        | 0.0     | 100.00%    | 710      | <a href="#">MT111842.1</a> |
| <input checked="" type="checkbox"/>                                                                                                   | <a href="#">Mitragnya speciosa strain White Jongkong clone K52_2 small subunit ribosomal RNA gene, partial sequence; internal transcribed spacer 1, 5.8S rRNA, ITS2, partial and complete sequence</a> | <a href="#">Mitragnya speciosa</a>  | 1301       | 1301        | 99%         | 0.0     | 100.00%    | 707      | <a href="#">MT111843.1</a> |
| <input checked="" type="checkbox"/>                                                                                                   | <a href="#">Mitragnya speciosa strain Green Maeng Da clone K49_1 small subunit ribosomal RNA gene, partial sequence; internal transcribed spacer 1, 5.8S rRNA, ITS2, partial and complete sequence</a> | <a href="#">Mitragnya speciosa</a>  | 1299       | 1299        | 99%         | 0.0     | 100.00%    | 703      | <a href="#">MT111840.1</a> |
| <input checked="" type="checkbox"/>                                                                                                   | <a href="#">Mitragnya speciosa isolation-source red-veined variety 18S ribosomal RNA gene, partial sequence; internal transcribed spacer 1, 5.8S rRNA, ITS2, partial and complete sequence</a>         | <a href="#">Mitragnya speciosa</a>  | 1297       | 1297        | 100%        | 0.0     | 99.86%     | 744      | <a href="#">JF412826.1</a> |
| <input checked="" type="checkbox"/>                                                                                                   | <a href="#">Mitragnya speciosa clone K51 Indonesian small subunit ribosomal RNA gene, partial sequence; internal transcribed spacer 1, 5.8S rRNA, ITS2, partial and complete sequence</a>              | <a href="#">Mitragnya speciosa</a>  | 1277       | 1277        | 98%         | 0.0     | 100.00%    | 692      | <a href="#">MT586314.1</a> |
| <input checked="" type="checkbox"/>                                                                                                   | <a href="#">Mitragnya speciosa strain Green Maeng Da clone K49_2 small subunit ribosomal RNA gene, partial sequence; internal transcribed spacer 1, 5.8S rRNA, ITS2, partial and complete sequence</a> | <a href="#">Mitragnya speciosa</a>  | 1219       | 1219        | 94%         | 0.0     | 99.70%     | 665      | <a href="#">MT111841.1</a> |
| <input checked="" type="checkbox"/>                                                                                                   | <a href="#">Mitragnya speciosa G13 genes for ITS1, 5.8S rRNA, ITS2, partial and complete sequence</a>                                                                                                  | <a href="#">Mitragnya speciosa</a>  | 1149       | 1149        | 88%         | 0.0     | 99.84%     | 625      | <a href="#">LC514373.1</a> |
| <input checked="" type="checkbox"/>                                                                                                   | <a href="#">Mitragnya speciosa MUS-5603-3 genes for ITS1, 5.8S rRNA, ITS2, partial and complete sequence</a>                                                                                           | <a href="#">Mitragnya speciosa</a>  | 1118       | 1118        | 86%         | 0.0     | 99.84%     | 608      | <a href="#">LC504152.1</a> |
| <input checked="" type="checkbox"/>                                                                                                   | <a href="#">Mitragnya speciosa MUS-5603-2 genes for ITS1, 5.8S rRNA, ITS2, partial and complete sequence</a>                                                                                           | <a href="#">Mitragnya speciosa</a>  | 1118       | 1118        | 86%         | 0.0     | 99.84%     | 608      | <a href="#">LC504148.1</a> |
| <input checked="" type="checkbox"/>                                                                                                   | <a href="#">Mitragnya speciosa MUS-5603-1 genes for ITS1, 5.8S rRNA, ITS2, partial and complete sequence</a>                                                                                           | <a href="#">Mitragnya speciosa</a>  | 1118       | 1118        | 86%         | 0.0     | 99.84%     | 608      | <a href="#">LC504144.1</a> |
| <input checked="" type="checkbox"/>                                                                                                   | <a href="#">Mitragnya speciosa MUS-5602-2 genes for ITS1, 5.8S rRNA, ITS2, partial and complete sequence</a>                                                                                           | <a href="#">Mitragnya speciosa</a>  | 1118       | 1118        | 86%         | 0.0     | 99.84%     | 608      | <a href="#">LC504140.1</a> |
| <input checked="" type="checkbox"/>                                                                                                   | <a href="#">Mitragnya speciosa MUS-5602-1 genes for ITS1, 5.8S rRNA, ITS2, partial and complete sequence</a>                                                                                           | <a href="#">Mitragnya speciosa</a>  | 1118       | 1118        | 86%         | 0.0     | 99.84%     | 608      | <a href="#">LC504136.1</a> |
| <input checked="" type="checkbox"/>                                                                                                   | <a href="#">Mitragnya speciosa MUS-5601-4 genes for ITS1, 5.8S rRNA, ITS2, partial and complete sequence</a>                                                                                           | <a href="#">Mitragnya speciosa</a>  | 1118       | 1118        | 86%         | 0.0     | 99.84%     | 608      | <a href="#">LC504132.1</a> |
| <input checked="" type="checkbox"/>                                                                                                   | <a href="#">Mitragnya speciosa MUS-5512-3 genes for ITS1, 5.8S rRNA, ITS2, partial and complete sequence</a>                                                                                           | <a href="#">Mitragnya speciosa</a>  | 1118       | 1118        | 86%         | 0.0     | 99.84%     | 608      | <a href="#">LC504128.1</a> |
| <input checked="" type="checkbox"/>                                                                                                   | <a href="#">Mitragnya speciosa MUS-5601-3 genes for ITS1, 5.8S rRNA, ITS2, partial and complete sequence</a>                                                                                           | <a href="#">Mitragnya speciosa</a>  | 1118       | 1118        | 86%         | 0.0     | 99.84%     | 608      | <a href="#">LC504124.1</a> |
| <input checked="" type="checkbox"/>                                                                                                   | <a href="#">Mitragnya speciosa MUS-5601-2 genes for ITS1, 5.8S rRNA, ITS2, partial and complete sequence</a>                                                                                           | <a href="#">Mitragnya speciosa</a>  | 1118       | 1118        | 86%         | 0.0     | 99.84%     | 608      | <a href="#">LC504120.1</a> |
| <input checked="" type="checkbox"/>                                                                                                   | <a href="#">Mitragnya speciosa MUS-5601-1 genes for ITS1, 5.8S rRNA, ITS2, partial and complete sequence</a>                                                                                           | <a href="#">Mitragnya speciosa</a>  | 1118       | 1118        | 86%         | 0.0     | 99.84%     | 608      | <a href="#">LC504116.1</a> |
| <input checked="" type="checkbox"/>                                                                                                   | <a href="#">Mitragnya speciosa MUS-5512-2 genes for ITS1, 5.8S rRNA, ITS2, partial and complete sequence</a>                                                                                           | <a href="#">Mitragnya speciosa</a>  | 1118       | 1118        | 86%         | 0.0     | 99.84%     | 608      | <a href="#">LC504112.1</a> |
| <input checked="" type="checkbox"/>                                                                                                   | <a href="#">Mitragnya speciosa genes for ITS1, 5.8S rRNA, ITS2, partial and complete sequence</a>                                                                                                      | <a href="#">Mitragnya speciosa</a>  | 1118       | 1118        | 86%         | 0.0     | 99.84%     | 608      | <a href="#">AB249645.1</a> |
| <input checked="" type="checkbox"/>                                                                                                   | <a href="#">Uncaria laevigata voucher K6 18S ribosomal RNA gene, partial sequence; internal transcribed spacer 1, 5.8S rRNA, ITS2, partial and complete sequence</a>                                   | <a href="#">Uncaria laevigata</a>   | 1070       | 1070        | 100%        | 0.0     | 94.06%     | 719      | <a href="#">MT263759.1</a> |
| <input checked="" type="checkbox"/>                                                                                                   | <a href="#">Uncaria macrophylla voucher GT-33 18S ribosomal RNA gene, partial sequence; internal transcribed spacer 1, 5.8S rRNA, ITS2, partial and complete sequence</a>                              | <a href="#">Uncaria macrophylla</a> | 1068       | 1068        | 100%        | 0.0     | 94.06%     | 718      | <a href="#">MF033305.1</a> |
| <input checked="" type="checkbox"/>                                                                                                   | <a href="#">Uncaria macrophylla voucher GT-29 18S ribosomal RNA gene, partial sequence; internal transcribed spacer 1, 5.8S rRNA, ITS2, partial and complete sequence</a>                              | <a href="#">Uncaria macrophylla</a> | 1068       | 1068        | 100%        | 0.0     | 94.06%     | 718      | <a href="#">MF033304.1</a> |
| <input checked="" type="checkbox"/>                                                                                                   | <a href="#">Uncaria macrophylla voucher GT-11 18S ribosomal RNA gene, partial sequence; internal transcribed spacer 1, 5.8S rRNA, ITS2, partial and complete sequence</a>                              | <a href="#">Uncaria macrophylla</a> | 1068       | 1068        | 100%        | 0.0     | 94.06%     | 718      | <a href="#">MF033302.1</a> |
| <input checked="" type="checkbox"/>                                                                                                   | <a href="#">Uncaria macrophylla voucher GT-3 18S ribosomal RNA gene, partial sequence; internal transcribed spacer 1, 5.8S rRNA, ITS2, partial and complete sequence</a>                               | <a href="#">Uncaria macrophylla</a> | 1068       | 1068        | 100%        | 0.0     | 94.06%     | 718      | <a href="#">MF033301.1</a> |
| <input checked="" type="checkbox"/>                                                                                                   | <a href="#">Uncaria macrophylla voucher GT-14 18S ribosomal RNA gene, partial sequence; internal transcribed spacer 1, 5.8S rRNA, ITS2, partial and complete sequence</a>                              | <a href="#">Uncaria macrophylla</a> | 1062       | 1062        | 100%        | 0.0     | 93.92%     | 718      | <a href="#">MF033303.1</a> |
| <input checked="" type="checkbox"/>                                                                                                   | <a href="#">Uncaria macrophylla voucher GT-A 18S ribosomal RNA gene, partial sequence; internal transcribed spacer 1, 5.8S rRNA, ITS2, partial and complete sequence</a>                               | <a href="#">Uncaria macrophylla</a> | 1062       | 1062        | 100%        | 0.0     | 93.92%     | 718      | <a href="#">MT263758.1</a> |

**Fig. 6S** Graphical overview of the BLAST results (January 2022) in NCBI GenBank database using Internal Transcribed Spacer (ITS) region. Sample K68 shows  $\geq 99$ -100% similarity with *Mitragnya speciosa*. The ITS sequence of K68 shows high homology with *M. speciosa* samples identified previously (K49, K51 and K52) [26, 27].

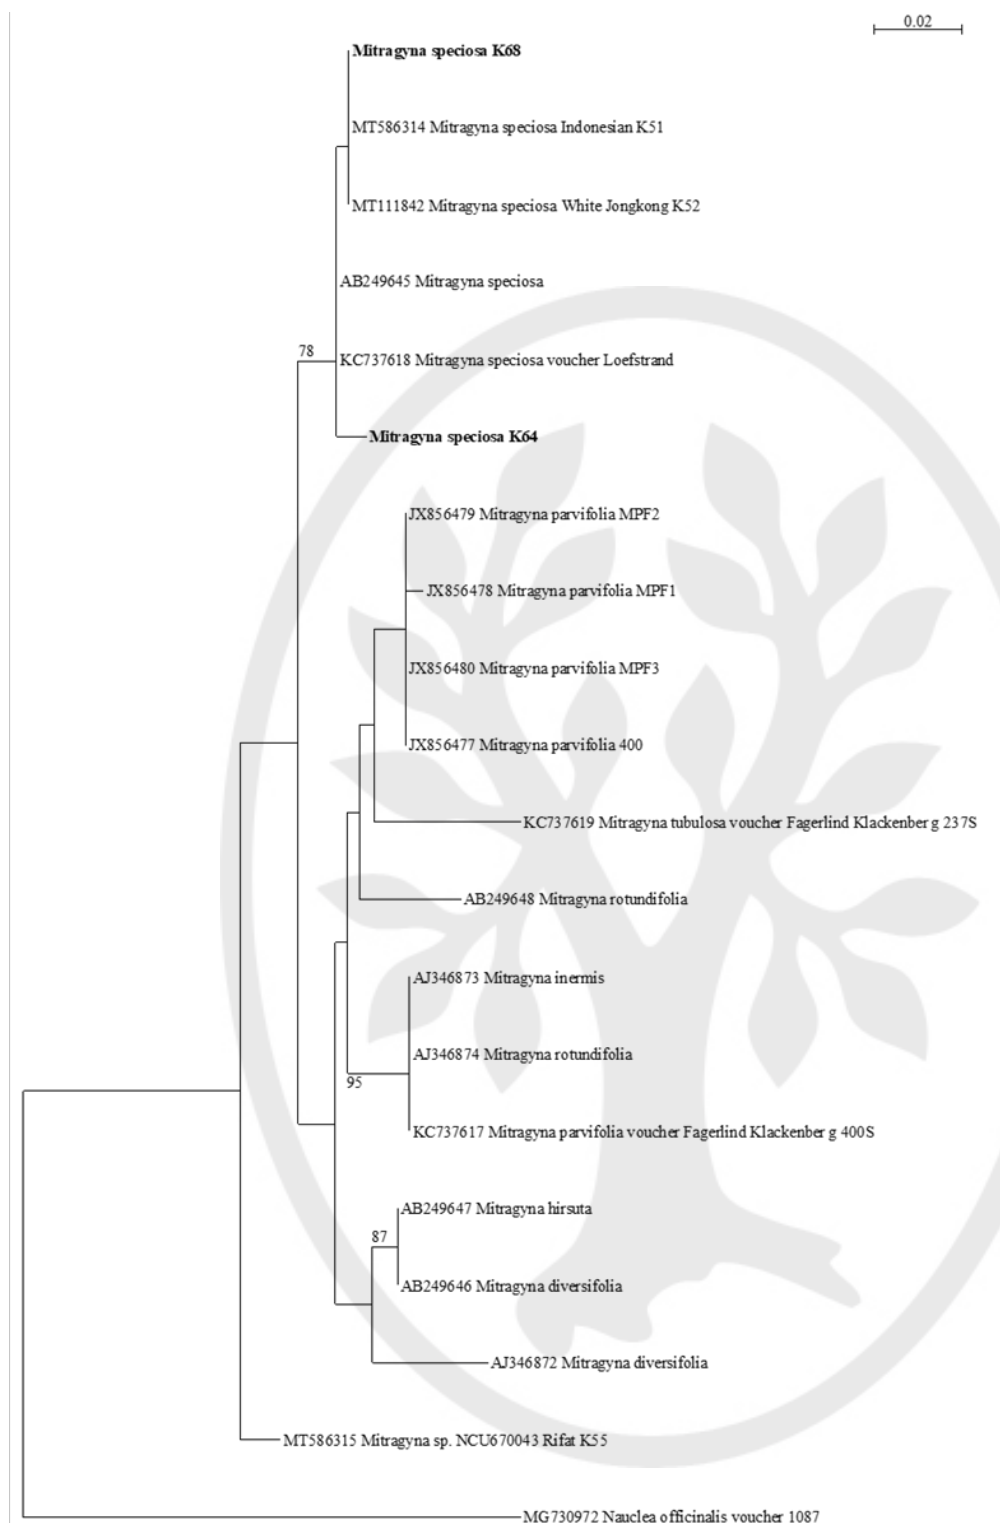

**Fig. 7S** Phylogram of the most likely tree ( $-\ln L = 1320.66$ ) from a RAxML analysis of 20 taxa based on ITS region (608 bp). Numbers refer to PhyML bootstrap support values  $\geq 70\%$  based on 1000 replicates. K64 and K68 group with *Mitragyna speciosa* with  $\geq 78\%$  PhyML bootstrap support. The tree is rooted with *Nauclea officinalis*. Bar indicates nucleotide substitutions per site. Phylogenetic tree was constructed using methodology described previously [26, 27].

**Table 6S** Precursor ion inclusion list for MS<sup>2</sup> analysis.

| Analyte                                                                                                          | Precursor ion (m/z)<br>[M+H] <sup>+</sup> | Molecular Formula                                             |
|------------------------------------------------------------------------------------------------------------------|-------------------------------------------|---------------------------------------------------------------|
| ajmalicine (10)                                                                                                  | 353.18597                                 | C <sub>21</sub> H <sub>24</sub> N <sub>2</sub> O <sub>3</sub> |
| isomitraphylline (1),<br>speciophylline (5),<br>mitraphylline (4)                                                | 369.18088                                 | C <sub>21</sub> H <sub>24</sub> N <sub>2</sub> O <sub>4</sub> |
| corynoxine (8)                                                                                                   | 383.19653                                 | C <sub>22</sub> H <sub>26</sub> N <sub>2</sub> O <sub>4</sub> |
| corynoxine A (7),<br>rhynchophylline (9)                                                                         | 385.21218                                 | C <sub>22</sub> H <sub>28</sub> N <sub>2</sub> O <sub>4</sub> |
| paynantheine (11),<br>isopaynantheine (14)                                                                       | 397.21218                                 | C <sub>23</sub> H <sub>28</sub> N <sub>2</sub> O <sub>4</sub> |
| isospeciofoleine (3),<br>mitragynine (12),<br>speciogynine (13),<br>speciociliatine (15),<br>mitraciliatine (16) | 399.19145                                 | C <sub>22</sub> H <sub>26</sub> N <sub>2</sub> O <sub>5</sub> |
| speciofoline (6)                                                                                                 | 401.20710                                 | C <sub>22</sub> H <sub>28</sub> N <sub>2</sub> O <sub>5</sub> |
| 7-hydroxymitragynine (2)                                                                                         | 415.22275                                 | C <sub>23</sub> H <sub>30</sub> N <sub>2</sub> O <sub>5</sub> |

**Table 7S** Constrain peak width settings used for peak integration.

|                          | Constrain peak width |                |
|--------------------------|----------------------|----------------|
|                          | Peak height (%)      | Tailing factor |
| isomitraphylline (1)     | 30                   | 2              |
| 7-hydroxymitragynine (2) | 20                   | 2              |
| isospeciofoleine (3)     | 40                   | 2              |
| speciofoline (6)         | 30                   | 2              |
| corynoxine A (7)         | 30                   | 2              |
| corynoxine (8)           | 30                   | 2              |
| rhynchophylline (9)      | 10                   | 2              |
| ajmalicine (10)          | 2                    | 3              |
| paynantheine (11)        |                      |                |
| D3-mitragynine           | 5                    | 2              |
| mitragynine (12)         | 2                    | 3              |
| speciogynine (13)        | 20                   | 2              |
| isopaynantheine (14)     | 5                    | 2              |
| speciociliatine (15)     | 5                    | 2              |
| mitraciliatine (16)      | 15                   | 2              |

## 2 References

1. Chittrakarn S, Penjamras P, Keawpradub N. Quantitative analysis of mitragynine, codeine, caffeine, chlorpheniramine and phenylephrine in a kratom (*Mitragyna speciosa* Korth.) cocktail using high-performance liquid chromatography. *Forensic Sci Int* 2012; 217: 81-86
2. Fowble KL, Musah RA. A validated method for the quantification of mitragynine in sixteen commercially available kratom (*Mitragyna speciosa*) products. *Forensic Sci Int* 2019; 299: 195-202
3. Kikura-Hanajiri R, Kawamura M, Maruyama T, Kitajima M, Takayama H, Goda Y. Simultaneous analysis of mitragynine, 7-hydroxymitragynine, and other alkaloids in the psychotropic plant "kratom" (*Mitragyna speciosa*) by LC-ESI-MS. *Forensic Toxicol* 2009; 27: 67-74
4. Kowalczyk AP, Łozak A, Zjawiony JK. Comprehensive methodology for identification of kratom in police laboratories. *Forensic Sci Int* 2013; 233: 238-243
5. Parthasarathy S, Ramanathan S, Murugaiyah V, Hamdan MR, Mohd Said MI, Lai C-S, Mansor SM. A simple HPLC–DAD method for the detection and quantification of psychotropic mitragynine in *Mitragyna speciosa* (ketum) and its products for the application in forensic investigation. *Forensic Sci Int* 2013; 226: 183-187
6. Sharma A, Kamble SH, León F, Chear NJY, King TI, Berthold EC, Ramanathan S, McCurdy CR, Avery BA. Simultaneous quantification of ten key Kratom alkaloids in *Mitragyna speciosa* leaf extracts and commercial products by ultra-performance liquid chromatography–tandem mass spectrometry. *Drug Test Anal* 2019; 11: 1162-1171
7. Wang M, Carrell EJ, Ali Z, Avula B, Avonto C, Parcher JF, Khan IA. Comparison of three chromatographic techniques for the detection of mitragynine and other indole and oxindole alkaloids in *Mitragyna speciosa* (kratom) plants. *J Sep Sci* 2014; 37: 1411-1418
8. Avula B, Sagi S, Wang Y-H, Wang M, Ali Z, Smillie TJ, Zweigenbaum J, Khan IA. Identification and characterization of indole and oxindole alkaloids from leaves of *Mitragyna speciosa* Korth using liquid chromatography–accurate QToF mass spectrometry. *J AOAC Int* 2015; 98: 13-21
9. Posch TN, Martin N, Pütz M, Huhn C. Nonaqueous capillary electrophoresis-mass spectrometry: A versatile, straightforward tool for the analysis of alkaloids from psychoactive plant extracts. *Electrophoresis* 2012; 33: 1557-1566
10. Chan K, Pakiam C, Rahim RA. Psychoactive plant abuse: the identification of mitragynine in ketum and in ketum preparations. *Bull Narc* 2005; 57: 249-256
11. Lydecker AG, Sharma A, McCurdy CR, Avery BA, Babu KM, Boyer EW. Suspected adulteration of commercial kratom products with 7-hydroxymitragynine. *J Med Toxicol* 2016; 12: 341-349
12. Mudge EM, Brown PN. Determination of mitragynine in *Mitragyna speciosa* raw materials and finished products by liquid chromatography with UV detection: Single-laboratory validation. *J AOAC Int* 2017; 100: 18-24
13. Chear NJ, Leon F, Sharma A, Kanumuri SRR, Zwolinski G, Abboud KA, Singh D, Restrepo LF, Patel A, Hiranita T, Ramanathan S, Hampson AJ, McMahon LR, McCurdy CR. Exploring the chemistry of alkaloids from Malaysian *Mitragyna speciosa* (kratom) and the role of oxindoles on human opioid receptors. *J Nat Prod* 2021; 84: 1034–1043

14. Limsuwanchote S, Wungsintaweekul J, Keawpradub N, Putalun W, Morimoto S, Tanaka H. Development of indirect competitive ELISA for quantification of mitragynine in kratom (*Mitragyna speciosa* (Roxb.) Korth.). *Forensic Sci Int* 2014; 244: 70-77
15. Oliveira AS, Fraga S, Carvalho F, Araújo AM, Pereira CC, Teixeira JP, de Lourdes Bastos M, de Pinho PG. Chemical characterization and in vitro cyto- and genotoxicity of 'legal high' products containing kratom (*Mitragyna speciosa*). *Forensic Toxicol* 2016; 34: 213-226
16. Scott TM, Yeakel JK, Logan BK. Identification of mitragynine and *O*-desmethyltramadol in kratom and legal high products sold online. *Drug Test Anal* 2014; 6: 959-963
17. Fuenffinger N, Ritchie M, Ruth A, Gryniwicz-Ruzicka C. Evaluation of ion mobility spectrometry for the detection of mitragynine in kratom products. *J Pharm Biomed Anal* 2017; 134: 282-286
18. Casey CR, Conley T, Heise A, Thomas T, Ayres PR. Quantitative and qualitative analysis of mitragynine in kratom (*Mitragyna speciosa*) by GC-MS, LC-MS/MS and UPLC-PDA. *J Reg Sci* 2015; 3: 1-14
19. Kerrigan S, Basiliere S. Kratom: A systematic review of toxicological issues. *WIREs Forensic Sci* 2021; e1420
20. Ponglux D, Wongseripipatana S, Takayama H, Kikuchi M, Kurihara M, Kitajima M, Aimi N, Sakai S-i. A new indole alkaloid, 7- $\alpha$ -hydroxy-7*H*-mitragynine, from *Mitragyna speciosa* in Thailand. *Planta Med* 1994; 60: 580-581
21. Morales-Ríos MS, Espiñeira J, Joseph-Nathan P. <sup>13</sup>C NMR spectroscopy of indole derivatives. *Magn Reson Chem* 1987; 25: 377-395
22. Shamma M, Richey JM. The stereochemistry of the heteroyohimbine alkaloids. *J Am Chem Soc* 1963; 85: 2507-2512
23. Johns SR, Lambertson JA. Uncaria alkaloids: Two stereoisomers of mitraphylline from *Uncaria bernaysii* F.v.Muell. and *U. ferrea* D.C. *Tetrahedron Lett* 1966; 7: 4883-4888
24. Seki H, Takayama H, Aimi N, Sakai S-i, Ponglux D. A nuclear magnetic resonance study on the eleven stereoisomers of heteroyohimbine-type oxindole alkaloids. *Chem Pharm Bull* 1993; 41: 2077-2086
25. Hemingway SR, Houghton PJ, Phillipson JD, Shellard EJ. 9-Hydroxyrhyinchophylline-type oxindole alkaloids. *Phytochemistry* 1975; 14: 557-563
26. Flores-Bocanegra L, Raja HA, Graf TN, Augustinovic M, Wallace ED, Hematian S, Kellogg JJ, Todd DA, Cech NB, Oberlies NH. The chemistry of kratom [*Mitragyna speciosa*]: Updated characterization data and methods to elucidate indole and oxindole alkaloids. *J Nat Prod* 2020; 83: 2165-2177
27. Todd DA, Kellogg JJ, Wallace ED, Khin M, Flores-Bocanegra L, Tanna RS, McIntosh S, Raja HA, Graf TN, Hemby SE, Paine MF, Oberlies NH, Cech NB. Chemical composition and biological effects of kratom (*Mitragyna speciosa*): In vitro studies with implications for efficacy and drug interactions. *Sci Rep* 2020; 10: 19158
